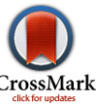

## Correction

# Correction: The Energy Expenditure of Stair Climbing One Step and Two Steps at a Time: Estimations from Measures of Heart Rate

## The PLOS ONE Staff

There is an error in the linear equation presented in the Results section. A subtraction sign was omitted during the typesetting process. Please see the corrected equation below.

$$\dot{V}O_2 = 22.1 \times \text{heart rate} - 1153.5 (R^2 = 0.90)$$

## Reference

1. Halsey LG, Watkins DAR, Duggan BM (2012) The Energy Expenditure of Stair Climbing One Step and Two Steps at a Time: Estimations from Measures of Heart Rate. PLoS ONE 7(12): e51213. doi:10.1371/journal.pone.0051213.

**Citation:** The PLOS ONE Staff (2014) Correction: The Energy Expenditure of Stair Climbing One Step and Two Steps at a Time: Estimations from Measures of Heart Rate. PLoS ONE 9(6): e100658. doi:10.1371/journal.pone.0100658

**Published:** June 13, 2014

**Copyright:** © 2014 The PLOS ONE Staff. This is an open-access article distributed under the terms of the Creative Commons Attribution License, which permits unrestricted use, distribution, and reproduction in any medium, provided the original author and source are credited.
